# Supplementary material for: Creating effective teams and valuing patient-centered care to change culture and improve equity on labor and delivery: a qualitative study
Source: Springer Nature journal article supplement (doi:10.1186/s12913-024-12108-3), 2024-12-23
Supplement: MOESM1 [file 12913_2024_12108_MOESM1_ESM.docx]

**Supplementary Information: Focus Group Discussion Guide**

Welcome and Introductory Questions

Thank you for agreeing to participate in this focus group. We are here to talk about general feelings about, preferences for, and supports for or barriers to vaginal vs. cesarean deliveries.

Some of you may have been part of focus groups in the past, others not. Just so we’re all on the same page I’d like to establish a few ground rules

- We are interested in hearing from everyone – this is why we asked you to be part of the group.
- Please do go ahead and talk with each other, it’s a conversation between all of us, not just with me.
- We are not trying to change any one’s mind or come to an agreement. Everyone should feel free to express their own ideas. If you have ideas or experiences different from others who have talked, please do speak up and add your voice because we are interested in all points of view – not just one.
- We have a certain number of questions to cover in the time we have. I may have to interrupt sometimes to move us along – if I do, please bear with me.
- Finally, a few quick reminders:
  - Please keep your cameras on so people can see when you are done speaking. It’s hard to converse if you aren’t sure when others have completed a thought.
  - Feel free to use the chat box to make comments while others are speaking.
  - You can use the raise hand marker to indicate that you have something to say.
  - For everyone’s privacy, please refer to yourself and other participants by their first names only. When sharing stories of patients on your unit, please do not identify them by name or any other protected health information.

**We have invited you to this group because your maternity unit recently participated in an initiative to improve its support for vaginal birth and reduce cesarean deliveries. We are interested in understanding the potential changes that occurred around this effort - not so much what you did as what helped make the changes possible. In other words, we’re interested in the clinical culture change that helped your hospital improve.**

1. **Think back to when you started this initiative. What actions did you take that worked?**
   - What made this work?
   - What got in the way of it working?
2. **Was there anything that you did to make sure changes you made were sustained?**
   - What got in the way of keeping changes permanent?
3. **Now, think about a hypothetical situation. A new clinician on your team seemed inclined toward a Cesarean in what appeared to be a non-complicated delivery. How do you think others on your team would react to this?**
   - What factors would most influence whether or not others pushed back against this doctor’s preference for a Cesarean?
   - Do you believe these factors have changed at all since the initiative? How so?
   - Did any actions by your unit, hospital or staff help prompt these changes or hardening in opinions? What were those? How did these firm up or change what people felt about these issues?
4. **Since the initiative began, have you seen any changes in your unit in terms of …**

- Teamwork and communication between administrators, providers, and nurses?
- The willingness of any team members to speak up about decisions they feel are affecting the chance for a vaginal birth?
  - What changes? How were these changes prompted?
  - How, if at all, did any of these changes affect your unit’s ability to support vaginal birth?

1. **Think about which organizational leaders or clinical directors set the protocols, policies, and procedures for your unit.** **What, if anything, did these individuals do as part of or in response to the initiative?**

- What things did leadership do that you felt was effective in promoting support for vaginal birth?
- Were there any things leadership did that you felt were meant to promote support for vaginal birth, but which actually had no effect or even backfired? What were those?
- Did leadership do or fail to do anything that you felt reduced support for vaginal birth? What was that?

1. **Now think about things that might be good incentives for you or your colleagues to make a practice change.**
   - What would most motivate providers to change?
   - What would most motivate providers to change?awards for specific patient outcomes. What would motivatessignments or shift schehat would most motivate nurses to change?
   - What would most motivate leaders to change?
2. **Let’s wrap up by going around the group and have each person share the most effective thing they felt happened to create a culture more supportive of vaginal births, and what about this made it effective.**
